# Supplementary material
Source: HighWire-hosted journal article supplement (https://bjsm.bmj.com/content/54/23/1405)
Supplement: inline-supplementary-material-3 [file inline-supplementary-material-3.xlsx]

## Sheet: Sheet1
Hypothetical identified barrier to cycling	Intervention function(s) to address barriers	Relevant action categories to address barriers
Identified from surveys, observations, evaluations, etc.	Identified using a theoretical understanding of cycling behaviour to determine which of the Michie (2011) intervention functions are likely to be effective	Select the most appropriate/feasible Action Categories based on factors such as local context, existing support, resource availability, and recipient preference; from here the most appropriate specific Action Typeswithin each Action Category can be selected in the same way.
Distance too great or route too hilly	A. Education	A3. Route planning/personal and individualised travel planning
	I. Enablement	I2. Provision of eBikes
Percieved lack of fitness	B. Persuasion	B3. Tailored intervention actions
	E. Training	E1. Practical cycling training courses and sessions
	I. Enablement	I2. Provision of ebikes
Cost	I. Enablement	I1. Provision of bike accessories
		I2. Provision of ebikes
		I3. Provision of bikes
		I4. Small scale bike share schemes
Lack of secure storage, showers and lockers	G. Environmental restructuring	G1. Bike storage
		G3. Facilities for cyclists
Lack of confidence on the road	A. Education	A1. Increasing knowledge or understanding of benefits of cycling
		A2. Increasing knowledge or understanding of cycling safety
		A3. Route planning/personal and individualised travel planning
		A4. Practical or instrumental understanding
	B. Persuasion	B1. One-to-one counselling
		B2. Group counselling
		B3. Tailored intervention actions
	E. Training	E1 Practical cycle training courses and sessions
	G. Environmental restructuring	G5. Safety features
		G6. Route signage
		G9. Group cycling
	H. Modelling	H1. "Buddying" systems
Unsure how to get from A to B	A. Education	A3. Route planning/personal and individualised travel planning
		A5. Signposting to cycling-related contacts
	G. Environmental restructuring	G9. Group cycling
	H. Modelling	H1. "Buddying" systems
Lack of experience	A. Education	A4. Practical or instrumental understanding
		A5. Signposting to cycling-related contacts
	E. Training	E.1 Practical cycle training courses and sessions
	G. Environmental restructuring	G7. Cycling related personnel
		G9. Group cycling
	H. Modelling	H1. "Buddying" systems
Lack of bike maintenance skills	A. Education	A4. Practical or instrumental understanding
	E. Training	E.1 Practical cycle training courses and sessions
	G2. Environmental restructuring	G2. Bike maintenance facilities
	I. Enablement	I5. Provision of bike maintenance
Nobody to cycle with	A. Education	A5. Signposting to cycling related contacts
	G. Environmental restructuring	G7. Cycling related personnel
		G8. Large events and mass participation
		G9. Group cycling
		G10. Workplace or organisational policies
	H. Modelling	H1. "Buddying" systems
